# Supplementary material for: Clinical practice guidelines for diagnosis of autism spectrum disorder in adults and children in the UK: a narrative review
Source: Springer Nature journal article supplement (doi:10.1186/s12888-018-1800-1), 2018-07-13
Supplement: MOESM1 [file 15952618]

## **Additional File 1: Data Extraction Framework**

### **SECTION A: document characteristics**

- A1 Name of document
- A2 Author
- A3 Year of publication
- A4 Journal title/publisher
- A5 Geographical remit
- A6 Type of document (practice parameter, clinical guideline etc.)
- A7 Status of document (statutory/guidance only etc.)
- A8 Who is the guidelines target audience?
- A9 What age range (of patients) does the document encompass?
- A10 Range of diagnoses covered by document
- A11 Legal Framework on which guidance is based?

### **SECTION B: Pre-diagnosis and context for diagnosis**

#### **DO THE GUIDELINES OFFER RECOMMENDATIONS RELATED TO THE FOLLOWING?**

- B1 Who can refer to autism team?
- B2 Which professionals can provide a diagnosis?
- B3 What training or experience of clinicians is required to diagnose?
- B6 Is there a stated or recommended age at which symptoms can be assessed/recognised?
- B4 Is there a targeted waiting time from referral to diagnosis?
- B5 Is there guidance about how to achieve any targeted waiting times?
- B6 Is there additional guidance about how to deal with numbers of patients waiting and throughput?

## **SECTION C: assessment process**

### **DO THE GUIDELINES OFFER RECOMMENDATIONS RELATED TO THE FOLLOWING?**

- C1 What should be included in a comprehensive assessment?
- C2 What should a diagnostic pathway should look like?
- C3 Which diagnostic criteria should be referred to (e.g. ICD/DSM-V)
- C4 Which diagnostic tools (or types of tools) must be used?
- C5 Whether multiple professional assessments are necessary or recommended?  
If so which professionals?
- C6 What the role of MDT should be?
- C7 How to manage the process if person has differential diagnosis/coexisting conditions?
- C8 How to manage the process if person has learning disability?
- C9 What to be aware of if there are culturally specific factors?
- C10 Whether advice or guidance from charities or political movements is included?
- C11 Whether local intervention, support or treatment resources are taken into account during decision?
- C12 Whether pragmatic decisions are made related to likely outcomes for the child/patient?
- C13 How to deal with if the diagnosis is **uncertain?**
- C14 How to deal with if the diagnosis is **disputed?** (if patient or other clinicians disagree)
- C15 How to involve the patient/family or carer in the diagnostic process or decision?

## **Section D: Post-diagnosis**

### **DO THE GUIDELINES OFFER RECOMMENDATIONS RELATED TO THE FOLLOWING?**

- D1 When and how to discharge?
- D2 How the decision should be explained to the family/patient?
- D3 Recommended next steps for patient including treatment, further testing or signposting??
- D4 How to support patient to deal with the potential impact of diagnosis?
- D5 How do the guidelines explain the value or usefulness of a diagnosis to the patient?
